# Supplementary material for: Biophysical properties of human breast cancer cells measured using silicon MEMS resonators and atomic force microscopy
Source: Royal Society of Chemistry journal article supplement (doi:10.1039/c4lc01179a), 2014-11-28
Supplement: c4lc01179a1.pdf [file c4lc01179a1.pdf]

### Supplemental Information

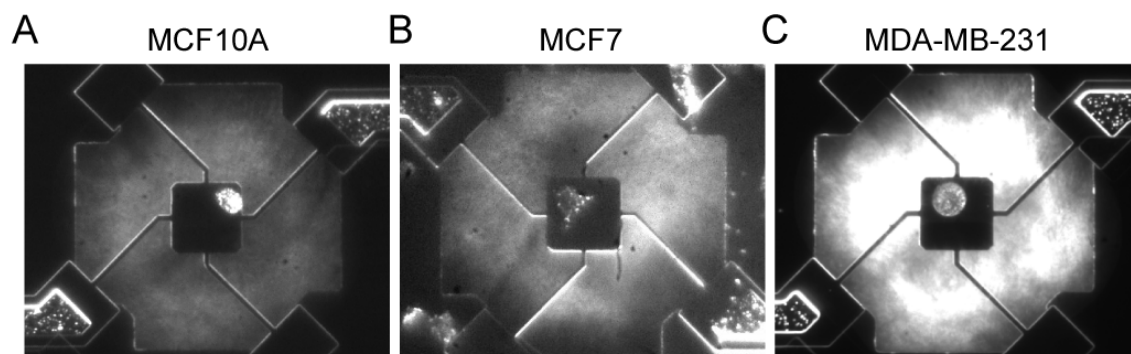

**Figure S1.** Dark field images of (A) MCF-10A, (B) MCF-7, and (C) MDA-MB-231 cells attached to the sensor area after collagen patterning and pluronic backfilling, demonstrating the imaging capabilities of the experimental setup.

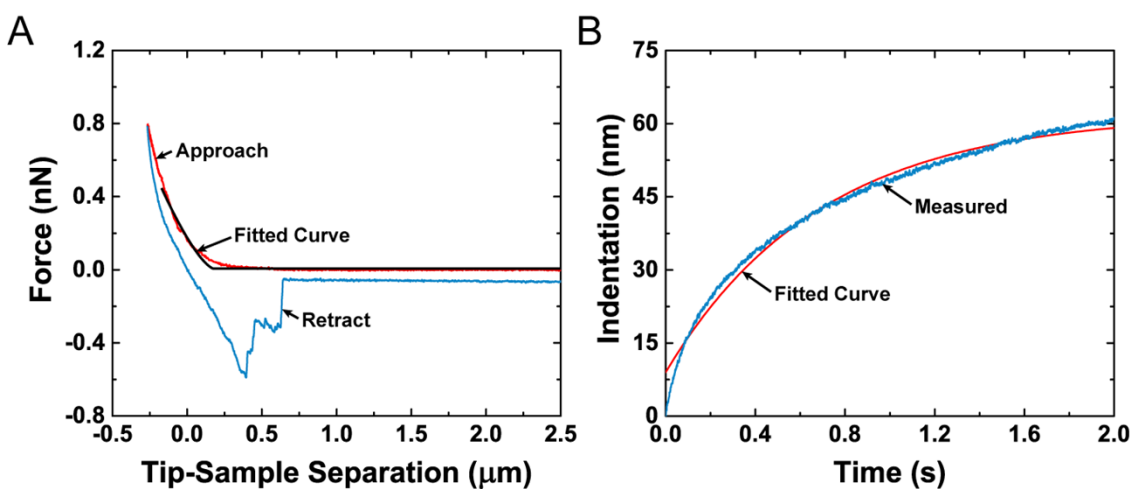

**Figure S2.** Overview of the atomic force microscopy mechanical property measurements. (A) Raw data of the force-indentation curve depicting the elastic deformation region. (B) Raw data of the indentation-time curve depicting the curve fit for the data set with fitted curve.
